# Supplementary material for: Pathogenic Mutations in Cancer-Predisposing Genes: A Survey of 300 Patients with Whole-Genome Sequencing and Lifetime Electronic Health Records
Source: PLoS One. 2016 Dec 8;11(12):e0167847. doi: 10.1371/journal.pone.0167847 (PMC5145192; doi:10.1371/journal.pone.0167847)
Supplement: S1 Table — (XLS) [file pone.0167847.s001.xls]

## Sheet: S1
Supplementary Table 1: 60 Autosomal Dominant Cancer-Predisposition Genes *.
GeneID	Gene	HGNC Approved Name	Cytogenetic	PubMed
238	ALK	anaplastic lymphoma receptor tyrosine kinase	2p23	18724359
324	APC	adenomatous polyposis coli	5q21-q22	23788249
8314	BAP1	BRCA1 associated protein-1 (ubiquitin carboxy-terminal hydrolase)	3p21.1	23684012
657	BMPR1A	bone morphogenetic protein receptor, type IA	10q22.3	23539595
673	BRAF	B-Raf proto-oncogene, serine/threonine kinase	7q34	23875798
672	BRCA1	breast cancer 1, early onset	17q21.31	23788249
675	BRCA2	breast cancer 2, early onset	13q12-q13	23788249
867	CBL	Cbl proto-oncogene, E3 ubiquitin protein ligase	11q23.3	23875798
79577	CDC73	cell division cycle 73	1q25	12960210
999	CDH1	cadherin 1, type 1, E-cadherin (epithelial)	16q22.1	12588804
1019	CDK4	cyclin-dependent kinase 4	12q13	14993899
1028	CDKN1C	cyclin-dependent kinase inhibitor 1C (p57, Kip2)	11p15.5	10424812
1029	CDKN2A	cyclin-dependent kinase inhibitor 2A	9p21	15146471
1050	CEBPA	CCAAT/enhancer binding protein (C/EBP), alpha	19q13.1	12661007
23405	DICER1	dicer 1, ribonuclease type III	14q32.13	21205968
4072	EPCAM	epithelial cell adhesion molecule	2p21	14993899
2271	FH	fumarate hydratase	1q42.1	12177782
2624	GATA2	GATA binding protein 2	3q21	21892162
3265	HRAS	Harvey rat sarcoma viral oncogene homolog	11p15.5	23875798
3845	KRAS	Kirsten rat sarcoma viral oncogene homolog	12p12.1	23875798
5604	MAP2K1	mitogen-activated protein kinase kinase 1	15q22.1-q22.33	23875798
5605	MAP2K2	mitogen-activated protein kinase kinase 2	19p13.3	23875798
4149	MAX	MYC associated factor X	14q23	21685915
4221	MEN1	multiple endocrine neoplasia I	11q13	23788249
4292	MLH1	mutL homolog 1	3p22.3	23788249
4436	MSH2	mutS homolog 2	2p21	23788249
2956	MSH6	mutS homolog 6	2p16	23788249
4763	NF1	neurofibromin 1	17q11.2	18772890
4771	NF2	neurofibromin 2 (merlin)	22q12.2	23788249
4893	NRAS	neuroblastoma RAS viral (v-ras) oncogene homolog	1p13.2	23875798
79728	PALB2	partner and localizer of BRCA2	16p12.1	17200671
5079	PAX5	paired box 5	9p13.2	24013638
8929	PHOX2B	paired-like homeobox 2b	4p13	22071890
5395	PMS2	PMS2 postmeiotic segregation increased 2 (S. cerevisiae)	7p22.1	23788249
5573	PRKAR1A	protein kinase, cAMP-dependent, regulatory, type I, alpha	17q24.2	11115848
5727	PTCH1	patched 1	9q22.1-q31	13851319
5728	PTEN	phosphatase and tensin homolog	10q23	4635800
5781	PTPN11	protein tyrosine phosphatase, non-receptor type 11	12q24.1	23926459
5894	RAF1	Raf-1 proto-oncogene, serine/threonine kinase	3p25	17603482
5925	RB1	retinoblastoma 1	13q14.2	23788249
5979	RET	ret proto-oncogene	10q11.2	23788249
861	RUNX1	runt-related transcription factor 1	21q22.3	23926459
6389	SDHA	succinate dehydrogenase complex, subunit A, flavoprotein (Fp)	5p15	23612575
54949	SDHAF2	succinate dehydrogenase complex assembly factor 2	11q12.2	23788249
6390	SDHB	succinate dehydrogenase complex, subunit B, iron sulfur (Ip)	1p36.1-p35	23788249
6391	SDHC	succinate dehydrogenase complex, subunit C, integral membrane protein, 15kDa	1q23.3	23788249
6392	SDHD	succinate dehydrogenase complex, subunit D, integral membrane protein	11q23	23788249
8036	SHOC2	soc-2 suppressor of clear homolog (C. elegans)	10q25	19684605
4089	SMAD4	SMAD family member 4	18q21.1	15754356
6597	SMARCA4	SWI/SNF related, matrix associated, actin dependent regulator of chromatin, subfamily a, member 4	19p13.3	24658002
6598	SMARCB1	SWI/SNF related, matrix associated, actin dependent regulator of chromatin, subfamily b, member 1	22q11.23	12016529
6654	SOS1	son of sevenless homolog 1 (Drosophila)	2p21	23875798
6794	STK11	serine/threonine kinase 11	19p13.3	23788249
51684	SUFU	suppressor of fused homolog (Drosophila)	10q24.32	19533801
55654	TMEM127	transmembrane protein 127	2q11.2	14993899
7157	TP53	tumor protein p53	17p13.1	23788249
7248	TSC1	tuberous sclerosis 1	9q34	23788249
7249	TSC2	tuberous sclerosis 2	16p13.3	23788249
7428	VHL	von Hippel-Lindau tumor suppressor, E3 ubiquitin protein ligase	3p25.3	23788249
7490	WT1	Wilms tumor 1	11p13	23788249
* Zhang et al. Germline Mutations in Predisposition Genes in Pediatric Cancer. NEJM. 2015; 373(24):2336-46.
